# Supplementary material
Source: HighWire-hosted journal article supplement (https://bmjopen.bmj.com/content/11/10/e054098)
Supplement: inline-supplementary-material-1 [file inline-supplementary-material-1.pdf]

Original Article**The risk of pneumothorax in pneumoconiosis patients in Taiwan:  
a retrospective cohort study****Supplemental Material****Running title:** Pneumothorax in Pneumoconiosis Patients**Authors**Jo-Hui Pan, M.D. <sup>1,3</sup>Chih-Hung Cheng, M.D. <sup>2,3</sup>Chao-Ling Wang, M.D. <sup>1</sup>Chia-Yen Dai, M.D., Ph.D. <sup>1,4</sup>Chau-Chyun Sheu, M.D. <sup>2,4,5</sup>Ming-Ju Tsai, M.D., Ph.D. <sup>2,4,5,\*</sup> (ORCID: 0000-0003-3621-3334)Jen-Yu Hung, M.D., Ph.D. <sup>2,3,4,5,6,\*</sup>Inn-Wen Chong, M.D. <sup>2,4,5</sup>

1 Department of Occupational and Environmental Medicine, Kaohsiung Medical University Hospital, Kaohsiung Medical University, Kaohsiung, Taiwan

2 Division of Pulmonary and Critical Care Medicine, Department of Internal Medicine, Kaohsiung Medical University Hospital, Kaohsiung Medical University, Kaohsiung, Taiwan

3 Graduate Institute of Medicine, College of Medicine, Kaohsiung Medical University, Kaohsiung, Taiwan

4 School of Medicine, College of Medicine, Kaohsiung Medical University, Kaohsiung, Taiwan

5 Department of Respiratory Care, College of Medicine, Kaohsiung Medical University, Kaohsiung, Taiwan

6 Department of Internal Medicine, Kaohsiung Municipal Ta-Tung Hospital, Kaohsiung Medical University, Kaohsiung, Taiwan

\* Corresponding authors

**Corresponding Authors****Ming-Ju Tsai, M.D., Ph.D.**

Division of Pulmonary and Critical Care Medicine, Department of Internal Medicine,  
Kaohsiung Medical University Hospital, No.100, Tz-You 1st Road, 807 Kaohsiung, Taiwan

E-mail: SiegfriedTsai@gmail.com

Tel.: +886 7 3121101, ext., 5651 Fax: +886 7 3161210

**Jen-Yu Hung, M.D., Ph.D.**

Division of Pulmonary and Critical Care Medicine, Department of Internal Medicine,  
Kaohsiung Medical University Hospital, No.100, Tz-You 1st Road, 807 Kaohsiung, Taiwan

E-mail: jenyuhung@gmail.com

Tel.: +886 7 3121101, ext., 5651 Fax: +886 7 3161210

**Table S1. Multivariable Cox regression analysis of the factors contributing to pneumothorax in the study population.**

| Variables                                                              | HR [95% CI]      | P value |
|------------------------------------------------------------------------|------------------|---------|
| <b>Pneumoconiosis patients vs. Control subjects</b>                    | 3.05 [2.18-4.27] | <0.0001 |
| <b>Male vs. Female</b>                                                 | 4.46 [2.70-7.37] | <0.0001 |
| <b>Age &gt; 65 vs. ≤65</b>                                             | 1.59 [1.17-2.17] | 0.0030  |
| <b>Residency (Northern Taiwan vs. Other areas)</b>                     | 0.74 [0.53-1.04] | 0.0795  |
| <b>Higher income (&gt;NT\$24000)<br/>vs. lower income (≤NT\$24000)</b> | 0.61 [0.39-0.96] | 0.0324  |
| <b>Presence of underlying diseases:</b>                                |                  |         |
| Heart disease                                                          | 1.70 [0.93-3.10] | 0.0868  |
| Peripheral vascular disease                                            | 3.50 [1.39-8.80] | 0.0078  |
| Major neurological disorder                                            | 1.78 [1.15-2.75] | 0.0098  |
| Chronic pulmonary disease                                              | 2.42 [1.73-3.38] | <0.0001 |
| Connective tissue disease                                              | 3.25 [1.31-8.07] | 0.0111  |
| Peptic ulcer disease                                                   | 1.00 [0.65-1.55] | 0.9876  |
| Liver disease                                                          | 1.31 [0.80-2.16] | 0.2800  |
| Diabetes mellitus                                                      | 0.58 [0.31-1.10] | 0.0931  |
| Renal disease                                                          | 1.21 [0.57-2.57] | 0.6175  |
| Cancer                                                                 | 1.30 [0.68-2.50] | 0.4337  |

Abbreviation: NT\$ = New Taiwan Dollar; HR = hazard ratio; CI = confidence interval.

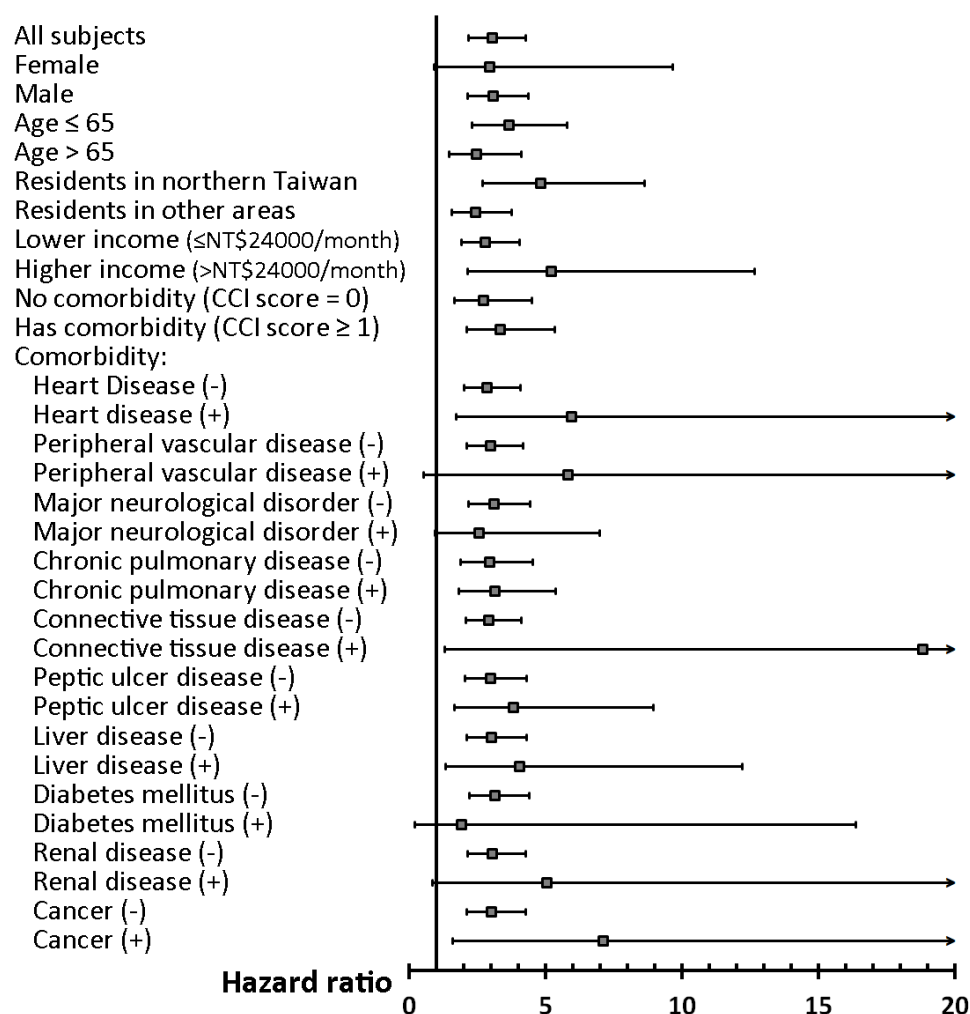

**Figure S1. Stratified analyses of multivariable Cox regression analyses assessing the effect of pneumoconiosis on incident pneumothorax.**

The results are presented with adjusted HRs (95% CI) of pneumoconiosis, which are adjusted for sex, age, residency, income level, and the presence of various comorbidities (except for the variable used for stratification).

\*Abbreviations: CCI = Charlson Comorbidity Index; HR = hazard ratio; CI = confidence interval.

**Table S2. Baseline characteristics of the propensity score (PS)-matched cohorts.**

|                                             | All subjects    | Pneumoconiosis  | Control         | P value |
|---------------------------------------------|-----------------|-----------------|-----------------|---------|
| <b>N</b>                                    | 9675            | 1935            | 7740            |         |
| <b>Sex, n (%)</b>                           |                 |                 |                 |         |
| Female                                      | 2800 (29%)      | 560 (29%)       | 2240 (29%)      |         |
| Male                                        | 6875 (71%)      | 1375 (71%)      | 5500 (71%)      |         |
| <b>Age (year), mean <math>\pm</math> SD</b> | 56.7 $\pm$ 15.6 | 56.7 $\pm$ 15.6 | 56.7 $\pm$ 15.6 |         |
| <b>Age (year), n (%)</b>                    |                 |                 |                 |         |
| $\leq 65$                                   | 6622 (68%)      | 1323 (68%)      | 5299 (68%)      |         |
| $> 65$                                      | 3053 (32%)      | 612 (32%)       | 2441 (32%)      |         |
| <b>Residency, n (%)</b>                     |                 |                 |                 | $>0.99$ |
| Northern Taiwan                             | 4315 (45%)      | 863 (45%)       | 3452 (45%)      |         |
| Other areas                                 | 5360 (55%)      | 1072 (55%)      | 4288 (55%)      |         |
| <b>Monthly income (NT\$), median (IQR)</b>  | 19200 (0-21900) | 19200 (0-21900) | 19200 (0-21900) | 0.5137  |
| <b>Monthly income (NT\$), n (%)</b>         |                 |                 |                 | 0.3931  |
| $\leq 24000$                                | 7596 (79%)      | 1533 (79%)      | 6063 (78%)      |         |
| $> 24000$                                   | 2079 (21%)      | 402 (21%)       | 1677 (22%)      |         |
| <b>CCI score, mean <math>\pm</math> SD</b>  | 0.5 $\pm$ 1     | 0.5 $\pm$ 1.1   | 0.5 $\pm$ 1     | 0.3092  |
| <b>CCI score, n (%)</b>                     |                 |                 |                 | 0.5506  |
| = 0                                         | 7038 (73%)      | 1389 (72%)      | 5649 (73%)      |         |
| = 1                                         | 1423 (15%)      | 292 (15%)       | 1131 (15%)      |         |
| $\geq 2$                                    | 1214 (13%)      | 254 (13%)       | 960 (12%)       |         |
| <b>Underlying diseases, n (%)</b>           |                 |                 |                 |         |
| Heart disease                               | 176 (2%)        | 42 (2%)         | 134 (2%)        | 0.1959  |
| Myocardial infarction                       | 49 (1%)         | 11 (1%)         | 38 (0%)         | 0.6674  |
| Congestive heart failure                    | 137 (1%)        | 31 (2%)         | 106 (1%)        | 0.4387  |
| Peripheral vascular disease                 | 42 (0%)         | 10 (1%)         | 32 (0%)         | 0.5362  |
| Major neurological disorder                 | 491 (5%)        | 96 (5%)         | 395 (5%)        | 0.7989  |
| Cerebral Vascular disease                   | 477 (5%)        | 96 (5%)         | 381 (5%)        | 0.9438  |
| Dementia                                    | 24 (0%)         | 4 (0%)          | 20 (0%)         | 0.6827  |
| Hemiplegia                                  | 41 (0%)         | 8 (0%)          | 33 (0%)         | 0.9376  |
| Chronic pulmonary disease                   | 1532 (16%)      | 306 (16%)       | 1226 (16%)      | 0.9778  |
| Connective tissue disease                   | 43 (0%)         | 7 (0%)          | 36 (0%)         | 0.5410  |
| Peptic ulcer disease                        | 874 (9%)        | 190 (10%)       | 684 (9%)        | 0.1778  |
| Liver disease                               | 512 (5%)        | 108 (6%)        | 404 (5%)        | 0.5249  |
| Diabetes mellitus                           | 458 (5%)        | 89 (5%)         | 369 (5%)        | 0.7557  |
| Renal disease                               | 120 (1%)        | 28 (1%)         | 92 (1%)         | 0.3583  |
| Cancer                                      | 139 (1%)        | 31 (2%)         | 108 (1%)        | 0.4943  |

Abbreviation: NT\$ = New Taiwan Dollar; CCI = Charlson Comorbidity Index;  
SD = standard deviation; IQR = interquartile range.

**Table S3. Incidence rate of pneumothorax (PTX) after the index date in each propensity score (PS)-matched cohort.**

|                                | Pneumoconiosis |     |         |     | Control |     |          |     | IRR [95% CI]       |
|--------------------------------|----------------|-----|---------|-----|---------|-----|----------|-----|--------------------|
|                                | N              | PTX | PY      | IR  | N       | PTX | PY       | IR  |                    |
| <b>All PS-matched subjects</b> | 1935           | 36  | 24639.4 | 1.5 | 7740    | 48  | 101849.3 | 0.5 | 3.1 [2.7-3.6]***   |
| <b>Stratified analyses</b>     |                |     |         |     |         |     |          |     |                    |
| <b>Sex</b>                     |                |     |         |     |         |     |          |     |                    |
| Female                         | 560            | 1   | 8115.7  | 0.1 | 2240    | 5   | 32460.7  | 0.2 | 0.8 [0.5-1.2]      |
| Male                           | 1375           | 35  | 16523.7 | 2.1 | 5500    | 43  | 69388.6  | 0.6 | 3.4 [2.9-4.0]***   |
| <b>Age</b>                     |                |     |         |     |         |     |          |     |                    |
| ≤ 50                           | 1323           | 22  | 18000.0 | 1.2 | 5299    | 25  | 74282.3  | 0.3 | 3.6 [3.1-4.3]***   |
| > 50                           | 612            | 14  | 6639.4  | 2.1 | 2441    | 23  | 27567.0  | 0.8 | 2.5 [2.0-3.2]***   |
| <b>Residents in</b>            |                |     |         |     |         |     |          |     |                    |
| Northern Taiwan                | 863            | 12  | 11836.9 | 1.0 | 3452    | 11  | 48460.0  | 0.2 | 4.5 [3.6-5.6]***   |
| Other areas                    | 1072           | 24  | 12802.5 | 1.9 | 4288    | 37  | 53389.2  | 0.7 | 2.7 [2.2-3.3]***   |
| <b>Monthly income</b>          |                |     |         |     |         |     |          |     |                    |
| ≤ NT\$24000                    | 1533           | 29  | 19155.5 | 1.5 | 6063    | 45  | 78417.2  | 0.6 | 2.6 [2.3-3.1]***   |
| > NT\$24000                    | 402            | 7   | 5483.9  | 1.3 | 1677    | 3   | 23432.0  | 0.1 | 10.0 [6.9-14.4]*** |
| <b>Comorbidity</b>             |                |     |         |     |         |     |          |     |                    |
| No (CCI score = 0)             | 1389           | 19  | 19330.8 | 1.0 | 5649    | 27  | 80127.9  | 0.3 | 2.9 [2.5-3.5]***   |
| Yes (CCI score ≥ 1)            | 546            | 17  | 5308.6  | 3.2 | 2091    | 21  | 21721.4  | 1.0 | 3.3 [2.6-4.3]***   |

\*\*\* $p < 0.0001$ 

Abbreviation: NT\$ = New Taiwan Dollar; CCI = Charlson Comorbidity Index;

N = number of patients; PTX = pneumothorax (number of patients);

PY = total patient-years;

IR = incident rate, as expressed as PTX incidence per 1000 patient-years;

IRR = incidence rate ratio; CI = confidence interval.

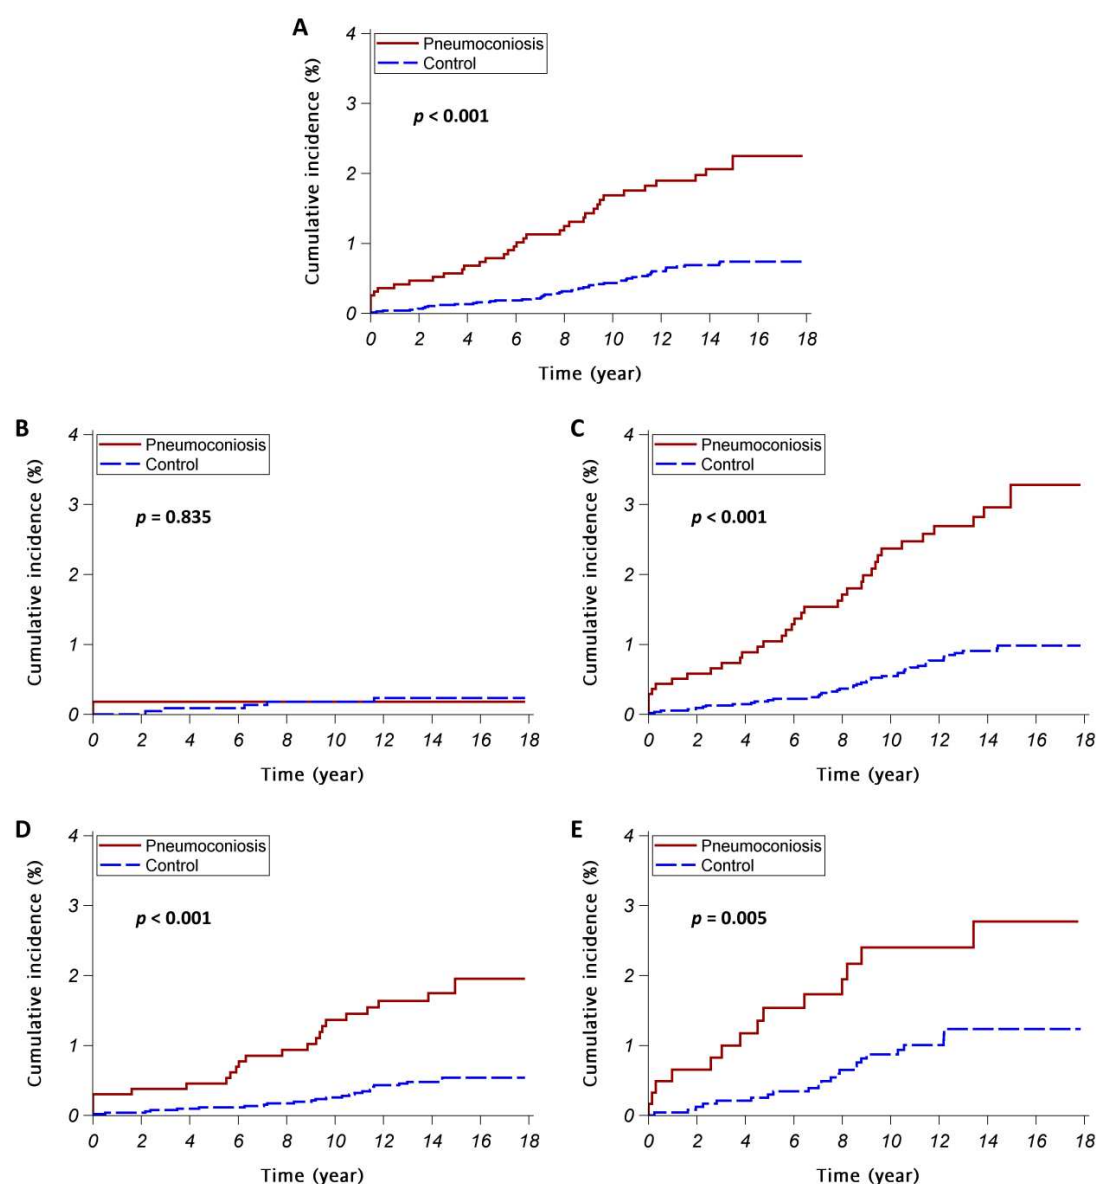

**Figure S2. The cumulative incidences of pneumothorax in the propensity score (PS)-matched cohorts.**

The red continuous lines and blue dashed lines show the cumulative incidence of pneumothorax for the pneumoconiosis patients and the control subjects respectively.

(a) all study subjects;

(b) female subjects; (c) male subjects;

(d) subjects aged  $\leq 65$  years; (e) subjects aged  $> 65$  years.

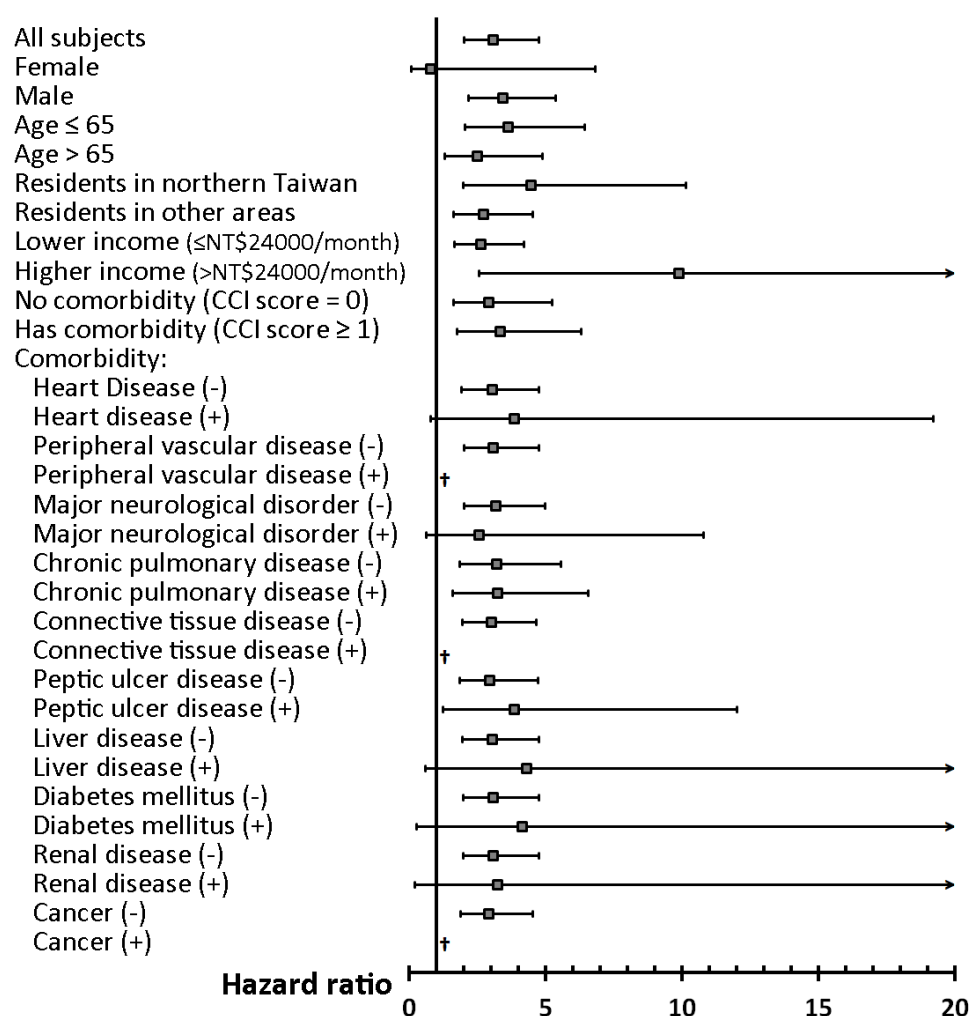

**Figure S3. Stratified analyses of univariate Cox regression analyses assessing the effect of pneumoconiosis on incident pneumothorax in the propensity score (PS)-matched cohorts.**

The results are presented with HRs (95% CI) of pneumoconiosis.

\*Abbreviations: CCI = Charlson Comorbidity Index; HR = hazard ratio; CI = confidence interval.

†: Due to small sample size, hazard ratio cannot be estimated.

**Table S4. Pneumoconiosis cases with pneumothorax reported from different countries and industries, available with patients' data.**

| Country      | Author (year)                     | Occupation                        | Case number      | Age                        | sex                 | Exposure      |                            | Smoking                |
|--------------|-----------------------------------|-----------------------------------|------------------|----------------------------|---------------------|---------------|----------------------------|------------------------|
|              |                                   |                                   |                  |                            |                     | dust          | duration                   |                        |
| Indonesia    | Amanda G (2016) <sup>1</sup>      | builder                           | 1                | 39                         | M                   | silica        | 18                         | Y                      |
| India        | Natarajan AS (1992) <sup>2</sup>  | silica flour mill worker          | 1                | 28                         | M                   | silica        | 7                          | N                      |
|              | Gupta KB (2006) <sup>3</sup>      | stone cutting                     | 1                | 26                         | M                   | silica        | 3                          | Y                      |
|              | Fotedar S (2010) <sup>4</sup>     | stone cutting                     | 1                | 24                         | M                   | silica        | 4                          | N                      |
|              | Bairagya T (2012) <sup>5</sup>    | stone cutting                     | 1                | 21                         | M                   | silica        | 4                          | Y                      |
|              | Srivastava GN (2014) <sup>6</sup> | stone crusher                     | 1                | 28                         | M                   | silica        | 1                          | N                      |
|              | Mishra P (2014) <sup>7</sup>      | well driller                      | 1                | 33                         | M                   | silica        | 10                         | N                      |
|              | Dixit R (2015) <sup>8</sup>       | stone crusher                     | 1                | 35                         | M                   | silica        | 2                          | N                      |
|              | Sharma RK (2017) <sup>9</sup>     | Stone mining                      | 20 (50)          | —                          | M(45), F(5)*        | silica        | 10 (5-15)*                 | Y(30)*                 |
|              | Bairwa MK (2019) <sup>10</sup>    | stone crusher & cutting           | 20               | 38.6 (26-65)               | M                   | silica        | 13.7 (5-24)                | Y(15)                  |
|              | Meena MK (2020) <sup>11</sup>     | stone mining                      | 22 (50)          | 38.70 (10.17) *            | —                   | silica        | 13.8 (4.8)*                | Y(38)*                 |
| Iran         | Mohebbi I (2007) <sup>12</sup>    | stone grinding                    | 7 (21)           | 26.43 (5.85)               | M*                  | silica        | 2.14 (1)                   | N*                     |
| Japan        | Hasejima N (1995) <sup>13</sup>   | beryllium-copper wire drawing     | 1                | 24                         | M                   | beryllium     | —                          | —                      |
|              | Handa T (2009) <sup>14</sup>      | —                                 | 2 (10)           | 33 (24-40) *               | M(4), F(6)*         | beryllium     | 5.84 (1-10.4)*             | —                      |
|              | Kobashi Y (2003) <sup>15</sup>    | —                                 | 1                | 46                         | M                   | silica        | 13                         | —                      |
|              | Kurihara T (2014) <sup>16</sup>   | —                                 | 1                | 71                         | M                   | asbestos      | —                          | —                      |
| Brazil       | Moreira MA (2010) <sup>17</sup>   | saws and knives sharpener         | 1                | 27                         | M                   | Hard metal    | 8                          | Y                      |
| Turkey       | Fidan F (2005) <sup>18</sup>      | welding                           | 1                | 23                         | M                   | Hard metal    | 8                          | Y                      |
|              | Sahbaz S (2007) <sup>19</sup>     | denim, sandblasting               | 2                | Case 1: 23<br>Case 2: 25   | M                   | silica        | Case 1: 3<br>Case 2: 1.5   | Case 1: Y<br>Case 2: — |
|              | Aydin Y (2010) <sup>20</sup>      | —                                 | 2 (5)            | 18.6 (16-22)*              | M*                  | silica        | —                          | Y *                    |
| Belgium      | Demoulin AS (2009) <sup>21</sup>  | metal sandblasting                | 1                | 26                         | M                   | silica        | 5                          | Y                      |
| South Africa | Oni T (2015) <sup>22</sup>        | gold miner                        | 1                | 59                         | M                   | silica        | 16.5                       | Y                      |
| Korea        | Yang HS (2014) <sup>23</sup>      | glass blending                    | 1                | 57                         | M                   | silica        | 20                         | Y                      |
| Morocco      | Elidrissi AM (2016) <sup>24</sup> | well-digger                       | 2 (54)           | 50 (34-82)*                | M                   | silica        | 12.9*                      | Y(36)*                 |
| China        | Zhang DH (2003) <sup>25</sup>     | gem worker                        | 5 (47)           | —                          | —                   | silica        | 4.67(1.17)*                | —                      |
|              | Wu N (2020) <sup>26</sup>         | Artificial Stone<br>Natural stone | 3 (18)<br>1 (63) | 36.1 (9.6)*<br>52.8 (8.6)* | M*<br>M(52), F(11)* | silica        | 6.4 (2.9)*<br>29.3 (11.7)* | Y(12)*<br>Y(43)*       |
| USA          | Suratt PM (1977) <sup>27</sup>    | tombstone sandblaster             | 4                | 36 (23-47)                 | M                   | silica        | 2.9 (1.6-5.3)              | Y(4)                   |
|              | Mindy J. (2002) <sup>28</sup>     | Aluminum welder                   | 1 (2)            | 43                         | M                   | Aluminum fume | 24                         | Y                      |

Cases are presented as pneumoconiosis with pneumothorax (total observation cases).

Age is presented as mean (SD or range); duration of exposure is presented in mean years (SD or range).

—, information not available or not stated; \* data for all observed cases; Y( ), yes(case number); N, not used.



1. Amanda G, Taufik FF. Recurrent secondary spontaneous pneumothorax in silicosis: a case report. *Pneumologia* 2016;65(4):207-9. [published Online First: 2016/10/01]
2. Natarajan AS, Gajalakshmi L, Karunakaran S. Accelerated Silicosis In A Silica Flour Mill Worker. *Lung India* 1992;10(1):33-37.
3. Gupta KB, Manchanda M, Kaur P. Bilateral spontaneous pneumothorax in silicosis. *Indian J Chest Dis Allied Sci* 2006;48(3):201-3. [published Online First: 2008/07/10]
4. Fotedar S, Chaudhary D, Singhla V, et al. Silicosis with bilateral spontaneous pneumothorax. *Lung India* 2010;27(3):173-5. doi: 10.4103/0970-2113.68325 [published Online First: 2010/10/12]
5. Bairagya T, Jana P, Das S, et al. Silicosis presenting with simultaneous bilateral spontaneous pneumothorax. *Annals of Tropical Medicine and Public Health* 2012;5(5):528-29. doi: 10.4103/1755-6783.105154
6. Srivastava GN, Prasad R, Meena M, et al. Acute silicosis with bilateral pneumothorax. *BMJ Case Rep* 2014;2014 doi: 10.1136/bcr-2013-200089 [published Online First: 2014/05/28]
7. Mishra P, Jacob SE, Basu D, et al. Bilateral spontaneous pneumothorax in chronic silicosis: a case report. *Case Rep Pathol* 2014;2014:561861. doi: 10.1155/2014/561861 [published Online First: 2014/04/20]
8. Dixit R, Meena M, Patil CB. Pneumomediastinum, bilateral pneumothorax and subcutaneous emphysema complicating acute silicosis. *Int J Occup Med Environ Health* 2015;28(3):635-8. doi: 10.13075/ijomh.1896.00399 [published Online First: 2015/07/21]
9. Sharma R, Luhadia A, Luhadia S, et al. Pneumothorax in the cases of silicosis in southern part of Rajasthan. *International Journal of Advances in Medicine* 2017;4(6):1547-50. doi: 10.18203/2349-3933.ijam20175061
10. Bairwa MK, Joshi N, Agnihotri SP. Silicosis with Bilateral Spontaneous Pneumothorax in Rajasthan. *Indian J Occup Environ Med* 2019;23(3):112-16. doi: 10.4103/ijoem.IJOEM\_247\_18 [published Online First: 2020/01/11]
11. Meena MK, Singh R, Joshi N, et al. Silicosis With Secondary Spontaneous Pneumothorax in the Western Rajasthan. *Cureus* 2020;12(11):e11811. doi: 10.7759/cureus.11811 [published Online First: 2021/01/08]
12. Mohebbi I, Hassani E, Salarilak S, et al. Do bullae and emphysema increase risk of pneumothorax in silicosis? *Journal of Occupational Medicine and Toxicology* 2007;2(1):8. doi: 10.1186/1745-6673-2-8
13. Hasejima N, Kobayashi H, Takezawa S, et al. [Chronic Beryllium disease after exposure to low-beryllium-content copper]. *Nihon Kyobu Shikkan Gakkai Zasshi* 1995;33(10):1105-10. [published Online First: 1995/10/01]
14. Handa T, Nagai S, Kitaichi M, et al. Long-term complications and prognosis of chronic beryllium disease. *Sarcoidosis Vasc Diffuse Lung Dis* 2009;26(1):24-31. [published Online First: 2009/12/08]
15. Kobashi Y, Manabe T, Hara H, et al. [A case of silicoproteinosis with pneumothorax]. *Nihon Kokyuki Gakkai Zasshi* 2003;41(2):117-22. [published Online First: 2003/05/02]
16. Kurihara T, Kawano D, Okamoto T, et al. [A case of surgical treatment for a bilateral pneumothorax that occurred in a patient with severe asbestosis and advanced emphysema]. *Fukuoka Igaku Zasshi* 2014;105(1):28-31. [published Online First: 2014/05/08]
17. Moreira MA, Cardoso Ada R, Silva DG, et al. Hard metal pneumoconiosis with spontaneous bilateral pneumothorax. *J Bras Pneumol* 2010;36(1):148-51. [published Online First: 2010/01/01]

- 2010/03/09]
18. Fidan F, Esme H, Unlu M, et al. Welder's lung associated with pneumothorax. *J Thorac Imaging* 2005;20(2):120-2. [published Online First: 2005/04/09]
  19. Sahbaz S, Inonu H, Ocal S, et al. Denim sandblasting and silicosis two new subsequent cases in Turkey. *Tuberk Toraks* 2007;55(1):87-91. [published Online First: 2007/04/03]
  20. Aydin Y, Turkyilmaz A, Intepe YS, et al. Simultaneous bilateral spontaneous pneumothorax: a rare emergency clinical condition. *Eurasian J Med* 2010;42(1):5-8. doi: 10.5152/eajm.2010.02 [published Online First: 2010/04/01]
  21. Demoulin AS, Hermans G, Gustin M. [An unusual interstitial pneumonitis]. *Rev Med Liege* 2009;64(7-8):373-6. [published Online First: 2009/09/26]
  22. Oni T, Ehrlich R. Complicated silicotuberculosis in a South African gold miner: A case report. *Am J Ind Med* 2015;58(6):697-701. doi: 10.1002/ajim.22454 [published Online First: 2015/04/29]
  23. Yang HS, Kim JI, Ye BJ, et al. A case of complicated silicosis with a complex clinical course in a glass manufacturing worker. *Ann Occup Environ Med* 2014;26:10. doi: 10.1186/2052-4374-26-10 [published Online First: 2014/06/11]
  24. Elidrissi AM, Zaghba N, Benjelloun H, et al. [Well-digger's lung]. *Pan Afr Med J* 2016;25:157. doi: 10.11604/pamj.2016.25.157.10824 [published Online First: 2017/03/16]
  25. Zhang DH, Qiu CY, Li HY, et al. [Epidemiological study of gem worker's silicosis]. *Zhonghua Lao Dong Wei Sheng Zhi Ye Bing Za Zhi* 2003;21(3):166-8. [published Online First: 2004/02/06]
  26. Wu N, Xue C, Yu S, et al. Artificial stone-associated silicosis in China: A prospective comparison with natural stone-associated silicosis. *Respirology* 2020;25(5):518-24. doi: 10.1111/resp.13744 [published Online First: 2019/12/13]
  27. Suratt PM, Winn WC, Jr., Brody AR, et al. Acute silicosis in tombstone sandblasters. *Am Rev Respir Dis* 1977;115(3):521-9. doi: 10.1164/arrd.1977.115.3.521 [published Online First: 1977/03/01]
  28. Hull MJ, Abraham JL. Aluminum welding fume-induced pneumoconiosis. *Human Pathology* 2002;33(8):819-25. doi: <https://doi.org/10.1053/hupa.2002.125382>
